# Supplementary material for: TIM29 is required for enhanced stem cell activity during regeneration in the flatworm Macrostomum lignano
Source: PubMed Central journal article supplement (PMC7806878; doi:10.1038/s41598-020-80682-7), 2021-01-13
Supplement: 41598_2020_80682_MOESM4_ESM.pdf [file 41598_2020_80682_MOESM4_ESM.pdf]

**TIM29 is required for enhanced stem cell activity during regeneration in the flatworm *Macrostomum lignano***

Stijn Mouton, Kirill Ustyantsev, Frank Beltman, Lisa Glazenburg, Eugene Berezikov

**Supplementary Table 3.** Enrichment of neoblast and germline transcripts in differentially expressed genes in various comparisons.

| Dataset                           | Expression Pattern | Germline | Neoblasts |
|-----------------------------------|--------------------|----------|-----------|
| TIM29 Cut compared to TIM29 Uncut | Up                 | 0.02     | 0.44      |
| TIM29 Cut compared to TIM29 Uncut | Down               | 5.01     | 1.18      |
| GFP Cut compared to GFP Uncut     | Up                 | 0.02     | 1.37      |
| GFP Cut compared to GFP Uncut     | Down               | 5.58     | 0.40      |
| TIM29 Cut compared to GFP Cut     | Up                 | 0.09     | 0.25      |
| TIM29 Cut compared to GFP Cut     | Down               | 0.68     | 4.77      |
| TIM29 Uncut compared to GFP Uncut | Up                 | ns       | ns        |
| TIM29 Uncut compared to GFP Uncut | Down               | ns       | ns        |

**Supplementary Table 5.** Primers for the production of dsRNA

| Gene name      | Transcript ID        | Forward primer         | Reverse primer         | Product size, nt |
|----------------|----------------------|------------------------|------------------------|------------------|
| <i>DUF2315</i> | <i>Mlig002791.g5</i> | GCTTGTTATCCTCTTCATCGTC | AAGCTTATGGTTAAACCTGGTG | 608              |
| <i>UPF0197</i> | <i>Mlig006314.g7</i> | CACTTCTTGACCGAATGTAAA  | TTTCGGGACTAATTCAAAGTCT | 658              |
| <i>DUF2366</i> | <i>Mlig032364.g1</i> | AAAGTTGAAAGCAAATTTCTGG | GCCAATCGATATAAAATTGGAA | 702              |
